# Supplementary material for: Genetic Analysis Using a Multi-Parent Wheat Population Identifies Novel Sources of Septoria Tritici Blotch Resistance
Source: MDPI journal article supplement (doi:10.3390/genes11080887), 2020-08-04
Supplement: s1 [file s1]

2016\_T1\_flag

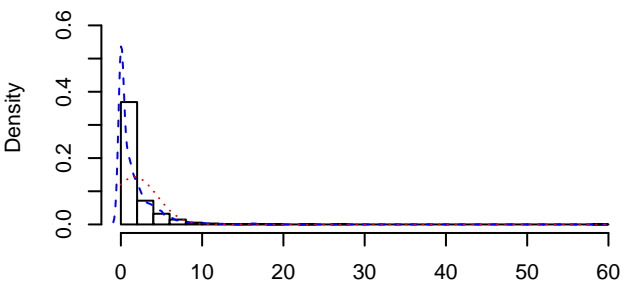

2016\_T1\_flag-1

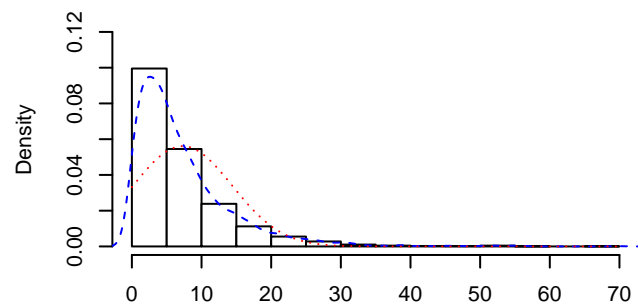

2016\_T1\_flag-2

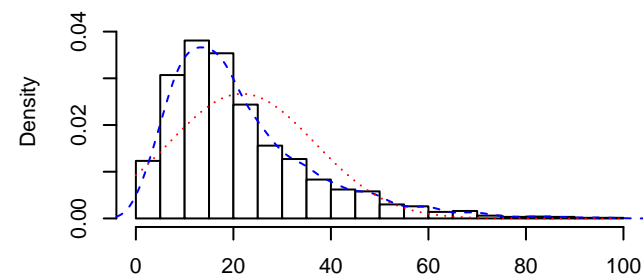

2016\_T2\_flag

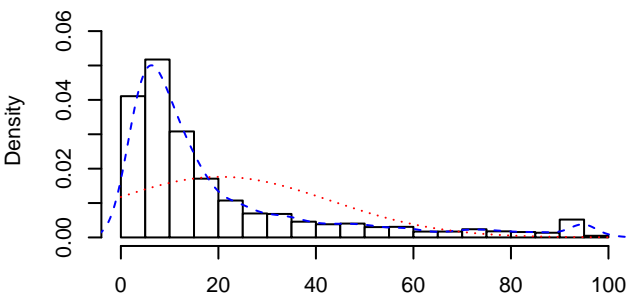

Height

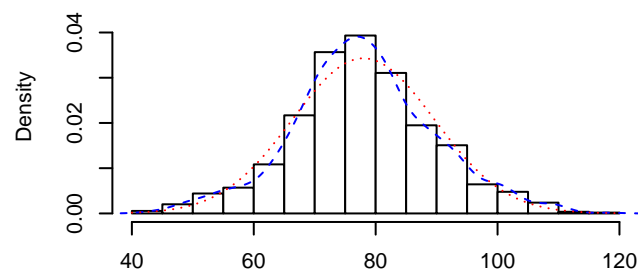

Days to flowering

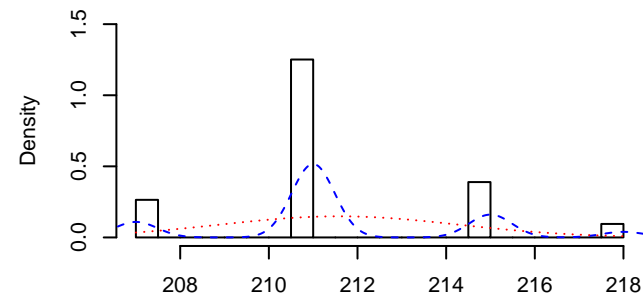

logit.2016\_T1\_flag

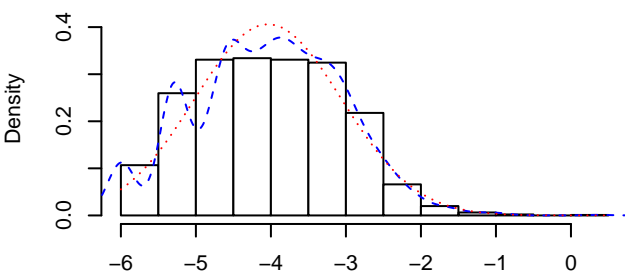

logit.2016\_T1\_flag-1

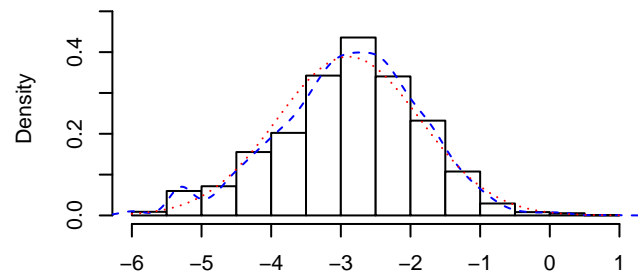

logit.2016\_T1\_flag-2

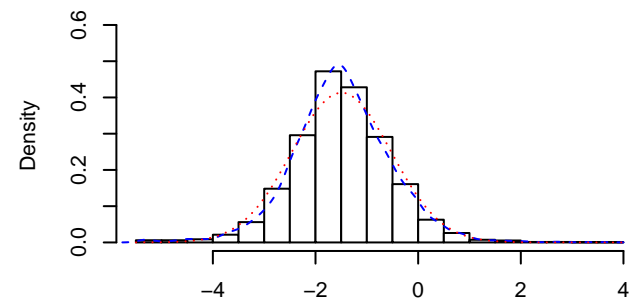

logit.2016\_T2\_flag

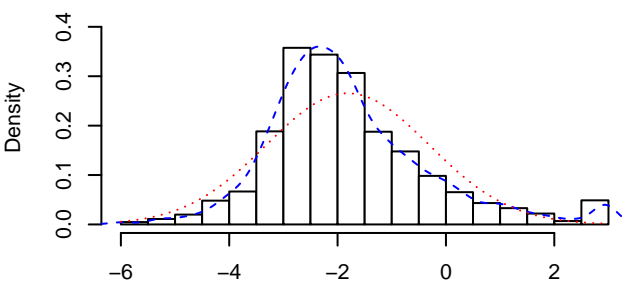

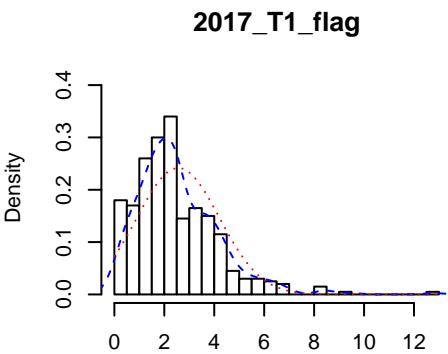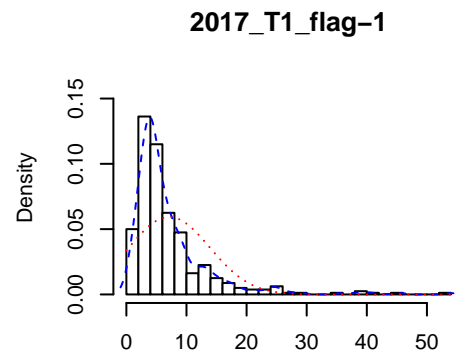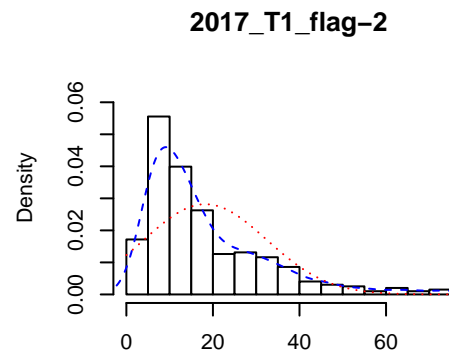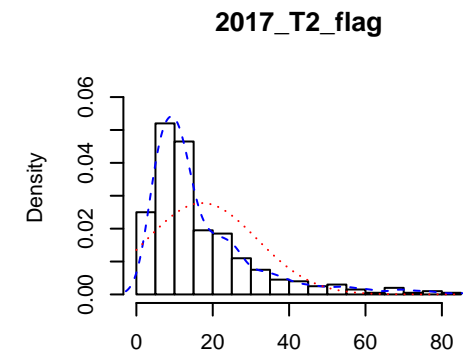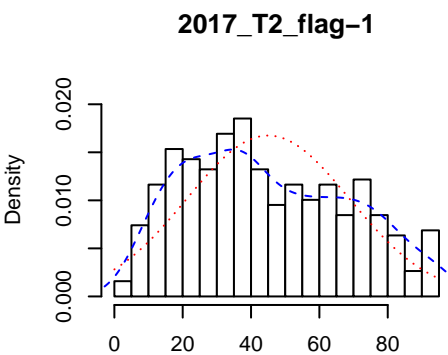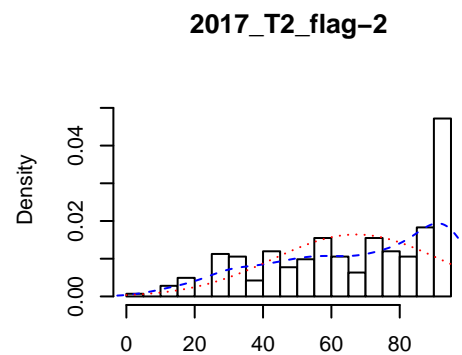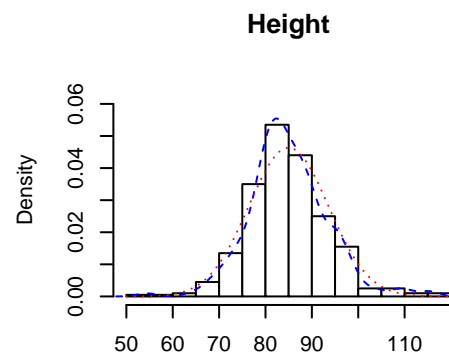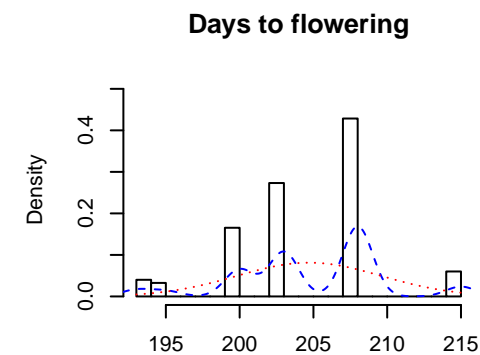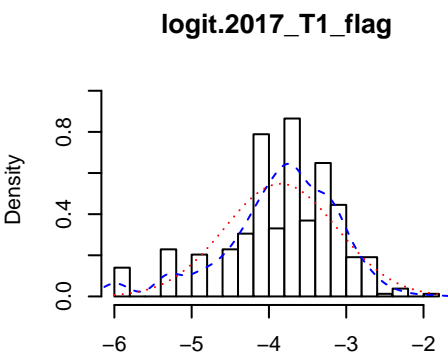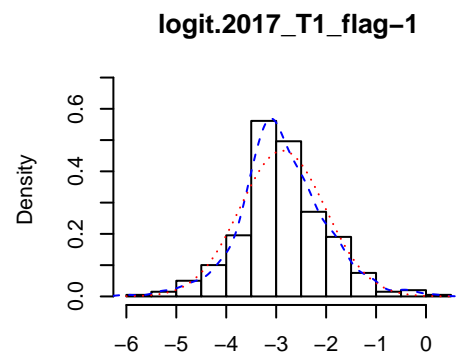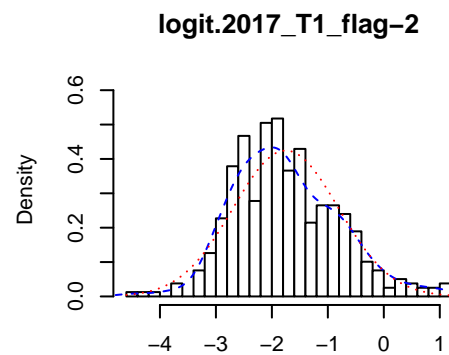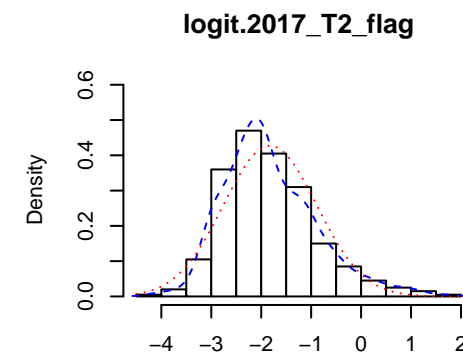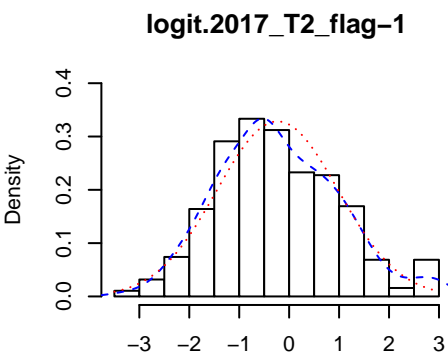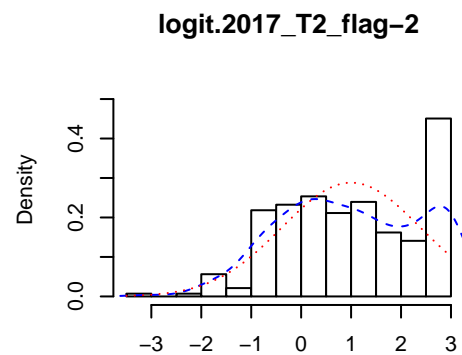

**2018\_T1\_flag**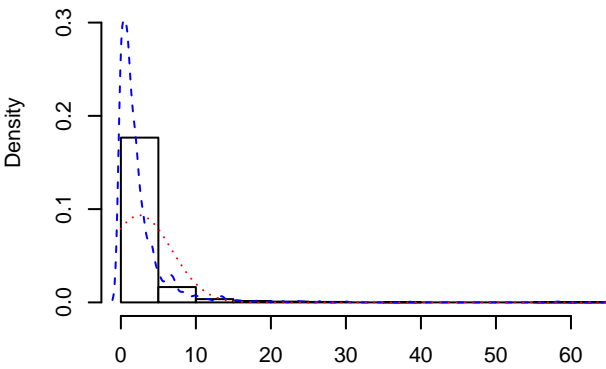**2018\_T1\_flag-1**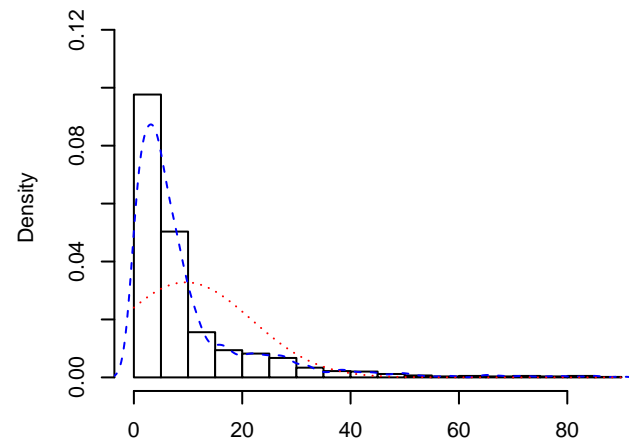**2018\_T1\_flag-2**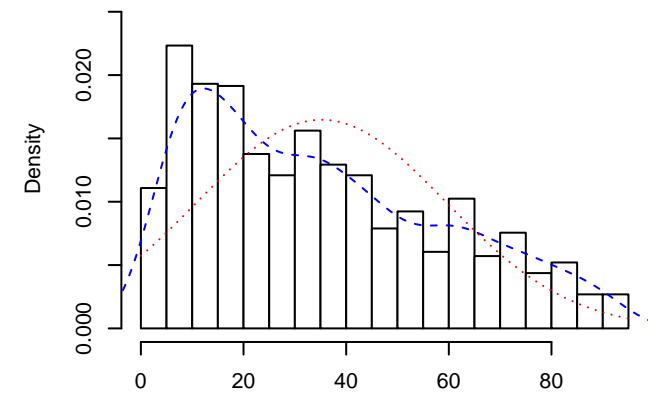**logit.2018\_T1\_flag**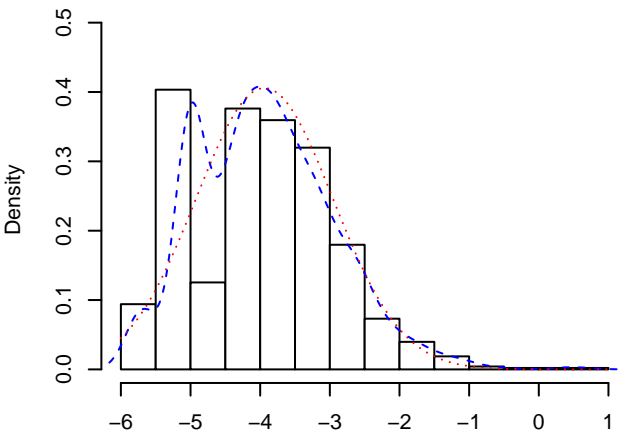**logit.2018\_T1\_flag-1**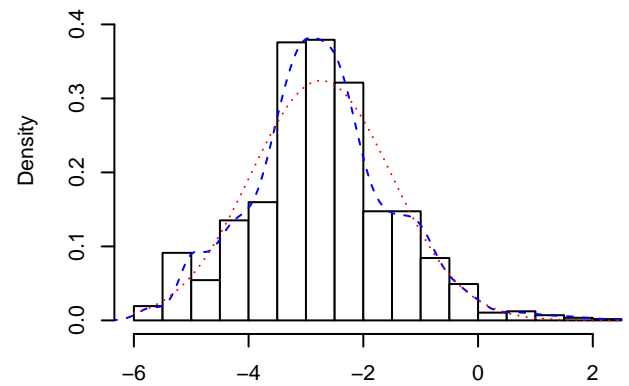**logit.2018\_T1\_flag-2**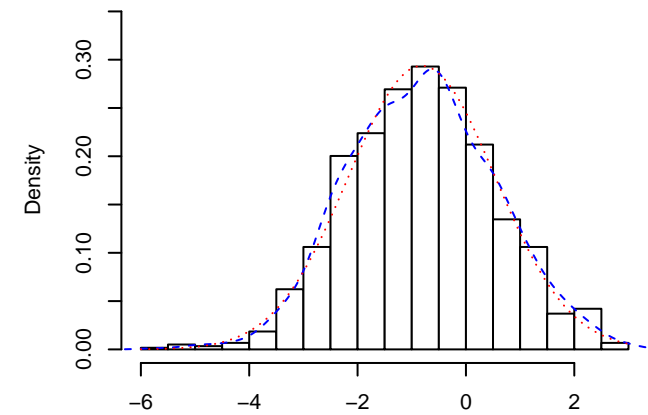**Height**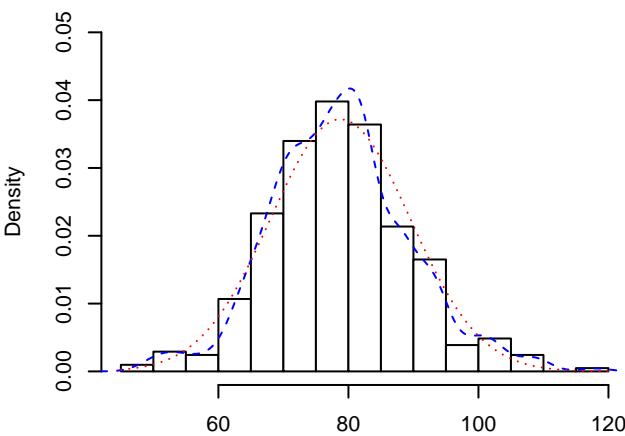**Days to flowering**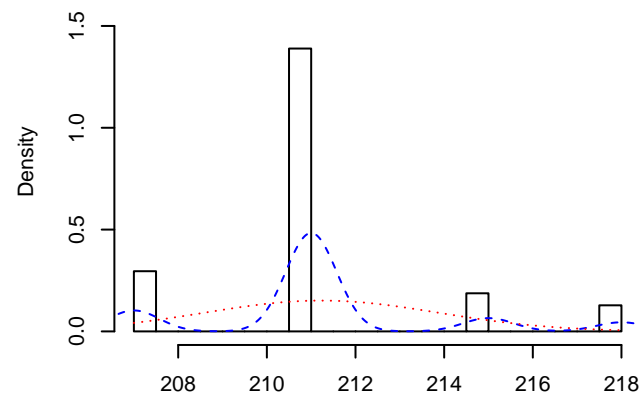

**Figure S1.** Density distribution (blue dotted line) and normal fit (red dotted line) plot of each dataset. The title of each graph such as “2016\_T1\_flag” represents year (2016, 2017, and 2018), time points (T1 and T2) and different leaves (flag, flag-1 and flag-2). The prefix “logit” is added to logit-transformed phenotypic data. In 2018, plant height and days to flowering data were used as surrogate from 2016 dataset.
